# Supplementary material
Source: MDPI journal article supplement (https://www.mdpi.com/2311-7524/9/2/222)
Supplement: s1 [file s1 › horticulturae-2191545-supplementary.pdf]

**Supplementary Table S1.** Prevailing climatic data at the experimental site during the two growing seasons of marigold (*C. officinalis* L.) 2019/2020 and 2020/2021.

| Climatic Data         | October |       | November |       | December |       | January |       | February |       | March |       |
|-----------------------|---------|-------|----------|-------|----------|-------|---------|-------|----------|-------|-------|-------|
|                       | I       | II    | I        | II    | I        | II    | I       | II    | I        | II    | I     | II    |
| Precipitation (mm)    | 1.0     | 3.1   | 0.0      | 6.7   | 2.8      | 0.6   | 0.0     | 2.0   | 3.2      | 5.4   | 0.3   | 5.2   |
| Temperature (°C)      | 28.9    | 29.7  | 23.9     | 21.1  | 16.9     | 18.8  | 15.8    | 14.2  | 17.9     | 16.9  | 20.2  | 25.1  |
| Evaporation (mm)      | 218.5   | 224.7 | 158.0    | 133.2 | 104.5    | 115.3 | 97.0    | 102.8 | 126.2    | 139.7 | 110.9 | 210.2 |
| Relative Humidity (%) | 54.0    | 53.0  | 56.0     | 58.0  | 61.0     | 62.0  | 58.0    | 60.0  | 54.0     | 51.0  | 49.0  | 47.0  |

I = the 2019/2020 season and II = the 2020/2021 season. The above-mentioned climatic data were reported according to the Meteorological Station of Beni-Suef, Egyptian Meteorological Authority, Egypt.

**Supplementary Table S2.** Physical and chemical properties of soil and chemical analysis of irrigation water used in the current study (average of two years).

| Soil Physical Analysis             |           |                         |                         |                  |                  |                              |                               |                               |                              |                              |                            |      |     |
|------------------------------------|-----------|-------------------------|-------------------------|------------------|------------------|------------------------------|-------------------------------|-------------------------------|------------------------------|------------------------------|----------------------------|------|-----|
| Silt %                             |           |                         | Clay %                  |                  |                  | Coarse Sand %                |                               |                               | Fine Sand %                  |                              | Soil Texture               |      |     |
| 28.64                              |           |                         | 56.35                   |                  |                  | 4.39                         |                               |                               | 10.62                        |                              | Clay                       |      |     |
| Soil Chemical Analysis             |           |                         |                         |                  |                  |                              |                               |                               |                              |                              |                            |      |     |
| pH                                 | EC (dS/m) | O.M %                   | Soluble Cations (meq/L) |                  |                  |                              | Soluble Anions (meq/L)        |                               |                              |                              | Available NPK (mg/kg soil) |      |     |
|                                    |           |                         | Na <sup>+</sup>         | K <sup>+</sup>   | Mg <sup>++</sup> | Ca <sup>++</sup>             | CO <sub>3</sub> <sup>-</sup>  | HCO <sub>3</sub> <sup>-</sup> | Cl <sup>-</sup>              | SO <sub>4</sub> <sup>-</sup> | N                          | P    | K   |
| 7.90                               | 1.51      | 1.17                    | 6.87                    | 0.39             | 2.43             | 5.25                         | 5.40                          | 2.14                          | 7.58                         | 4.51                         | 38.52                      | 7.69 | 194 |
| Irrigation Water Chemical Analysis |           |                         |                         |                  |                  |                              |                               |                               |                              |                              |                            |      |     |
| EC (dS/m)                          | pH        | Soluble Cations (meq/L) |                         |                  |                  |                              | Soluble Anions (meq/L)        |                               |                              |                              |                            |      |     |
|                                    |           | Na <sup>+</sup>         | K <sup>+</sup>          | Mg <sup>++</sup> | Ca <sup>++</sup> | CO <sub>3</sub> <sup>-</sup> | HCO <sub>3</sub> <sup>-</sup> | Cl <sup>-</sup>               | SO <sub>4</sub> <sup>-</sup> |                              |                            |      |     |
| 7.12                               | 4.29      | 20.55                   | 0.91                    | 8.03             | 8.74             | 0.00                         | 2.14                          | 23.50                         | 17.42                        |                              |                            |      |     |
